# Supplementary material for: One-pot synthesis of water-stable gadolinium-doped Yb(OH)CO3 nanoprobes for in vivo dual MR and CT imaging
Source: Royal Society of Chemistry journal article supplement (doi:10.1039/c3nj00536d), 2013-01-01
Supplement: c3nj00536d.pdf [file c3nj00536d.pdf]

**Supporting information for:**

**One-Pot Synthesis of Water-Stable Gadolinium-Doped Yb(OH)CO<sub>3</sub>  
Nanoprobes for In Vivo Dual MR and X-ray CT Imaging**

*Yinhua Jin<sup>a,b</sup>, Jianhua Liu<sup>c,d</sup>, Quan Zheng<sup>b</sup>, Jun Xu<sup>b</sup>, Bhoj Raj Sharma<sup>c</sup>, Guilin He<sup>b</sup>, Min Yan<sup>b</sup>, Lin Zhang<sup>b</sup>, Yang  
Song<sup>b</sup>, Tao Li<sup>b</sup>, Qinghai Yuan<sup>c\*</sup>, Yong Sun<sup>d\*</sup> and Haishan Yang<sup>a\*</sup>*

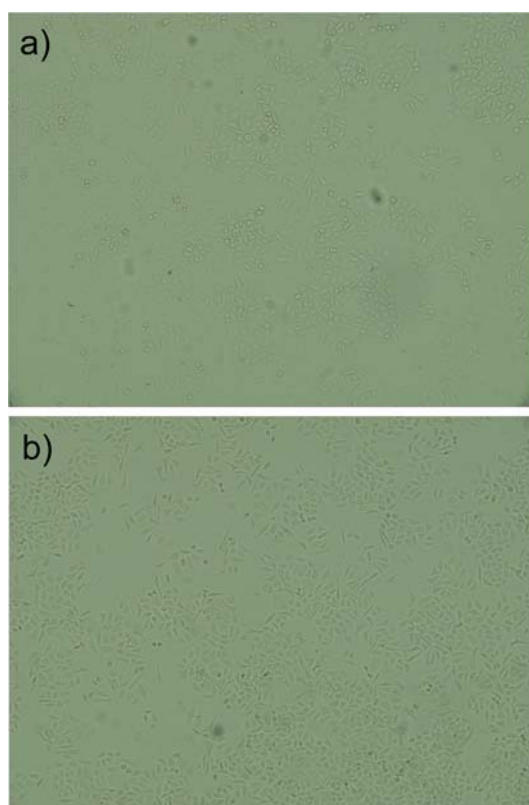

**Figure S1.** Microscopic images of HepG2 cells incubated without (a) and with (b) Yb(OH)CO<sub>3</sub>:Gd nanoparticles.

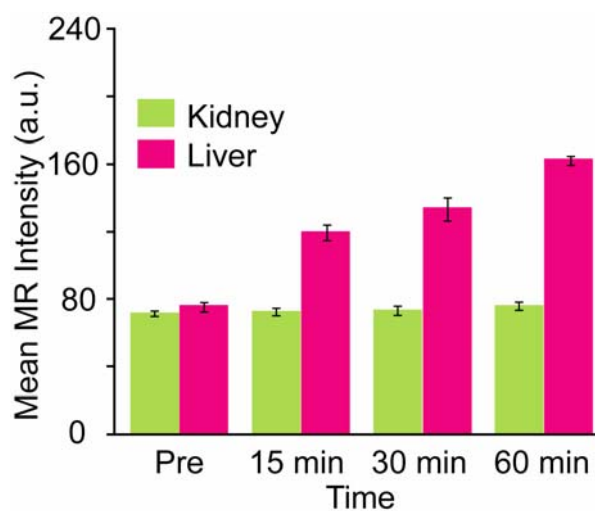

**Figure S2.** In vivo mean intensity of T<sub>1</sub>-weighted MR signals of a rat before and after intravenous injection of Yb(OH)CO<sub>3</sub>:Gd nanoparticles at different timed intervals.

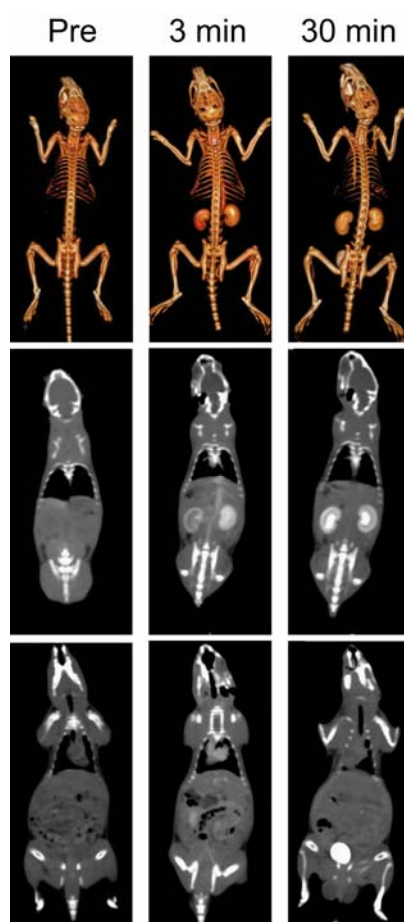

**Figure S3.** In vivo serial CT view images of rats after intravenous injection of Iobitridol solution at different timed intervals.

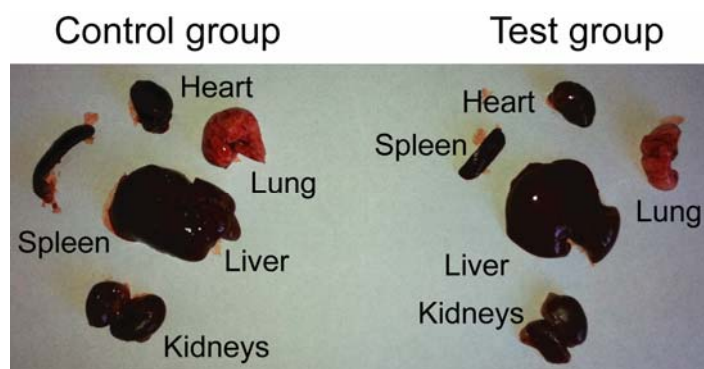

**Figure S4.** Organ changes of the mice after intravenous injection of 0.9 wt% NaCl as control group and  $\text{Yb(OH)CO}_3\text{:Gd}$  nanoparticles as test group.

**Table S1:** Exact value of hemolysis percentage upon Yb(OH)CO<sub>3</sub>:Gd nanoparticles with different concentrations (PBS denoted as 0 and water denoted as 100).

| Concentrations ( mg RE mL <sup>-1</sup> ) | Value of hemolysis (%) |
|-------------------------------------------|------------------------|
| 0.078125                                  | -0.035                 |
| 0.15625                                   | 0.002                  |
| 0.3125                                    | 0.010                  |
| 0.625                                     | 0.087                  |
| 0.125                                     | -0.108                 |
| 0.25                                      | 0.225                  |
| 0.50                                      | 0.394                  |
| 1.00                                      | 0.589                  |

**Table S2:** CT values of the heart, liver, spleen, kidneys, and renal pelvis of a rat before and after intravenous administration of 1 mL of Yb(OH)CO<sub>3</sub>:Gd solution (50 mg RE mL<sup>-1</sup>) at different timed intervals.

| Time          | Heart | Liver | Spleen | Kidneys   | Bladder |
|---------------|-------|-------|--------|-----------|---------|
| Pre-injection | 56.4  | 63.9  | 57.3   | 54.2/52.3 | 46.3    |
| 15 min        | 59.8  | 143.2 | 106.3  | 53.5/54.9 | 47.1    |
| 30 min        | 55.7  | 198.7 | 156.7  | 56.1/55.6 | 45.9    |
| 60 min        | 56.3  | 213.5 | 198.4  | 54.8/53.6 | 46.2    |

**Table S3:** CT values of the heart, liver, spleen, kidneys, and renal pelvis of a rat before and after intravenous administration of 0.3 mL of Iobitridol (350 mg I mL<sup>-1</sup>) at different timed intervals.

| Time          | Heart | Liver | Spleen | Kidneys     | Bladder |
|---------------|-------|-------|--------|-------------|---------|
| Pre-injection | 59.3  | 68.5  | 65.3   | 55.6/57.3   | 51.2    |
| 3 min         | 62.7  | 70.3  | 63.6   | 172.5/176.9 | 49.7    |
| 30 min        | 61.5  | 69.4  | 63.2   | 368.2/359.6 | 708.2   |

**Table S4:** Hematology analysis and blood biochemical assay 30 days after intravenous administration.

| Test                                                | Unit                | Control group (mean $\pm$ sd) | Treatment group (mean $\pm$ sd) |
|-----------------------------------------------------|---------------------|-------------------------------|---------------------------------|
| blood cell count (WBC)                              | $\times 10^9/L$     | $10.4 \pm 3.5$                | $9.8 \pm 2.7$                   |
| red cell count (RBC)                                | $\times 10^{12}/L$  | $9.6 \pm 2.3$                 | $9.2 \pm 2.7$                   |
| hemoglobin (HGB)                                    | g/L                 | $172 \pm 30.2$                | $164 \pm 42.3$                  |
| mean corpuscular hemoglobin<br>(MCH)                | pg                  | $18.1 \pm 3.2$                | $17.2 \pm 2.6$                  |
| mean corpuscular hemoglobin<br>concentration (MCHC) | g/L                 | $320 \pm 23.9$                | $333 \pm 38.1$                  |
| alanine aminotransferase (ALT)                      | U/L                 | $45.3 \pm 5.5$                | $46.1 \pm 8.8$                  |
| aspartate aminotransferase (AST)                    | U/L                 | $165.3 \pm 27.1$              | $173.2 \pm 35.1$                |
| blood urea nitrogen (BUN)                           | $\times 10^6/\mu L$ | $9 \pm 1.6$                   | $8.7 \pm 3.2$                   |
| plasma creatinine (CRE)                             | $\times 10^3/\mu L$ | $23.5 \pm 2.7$                | $26.7 \pm 4.3$                  |
